# Supplementary material
Source: PubMed Central journal article supplement (PMC7081507)
Supplement: Supplemental_material.pdf [file Supplemental_material.pdf]

**Supplementary Table 1.** Case history reported from 35 porcine cases submitted to the Iowa State University Veterinary Diagnostic Laboratory that detected a MN99-like H1 or TX98-like H3 hemagglutinin sequence.

| HA no. | HA clade                  | Prod. system | Site | Month | State | Prod. stage | Specimen*  | PCR Ct | PCR subtype | Co-detection |
|--------|---------------------------|--------------|------|-------|-------|-------------|------------|--------|-------------|--------------|
| 1      | C-I                       | A02139351†   | S1   | Jan   | IA    | Nursery     | Isolate    | 18.1   | H3N2        | ND           |
| 2      | C-I                       | PS1          | S2   | Feb   | KY    | Finisher    | Oral fluid | 30.0   | H3N2        | ND           |
| 3      | $\gamma$ 2- $\beta$ -like | PS2          | S3   | Feb   | OH    | Adult       | Nasal swab | 32.1   | H1/3N1/2    | H3-2010.1    |
| 4      | $\gamma$ 2- $\beta$ -like | PS3          | S4   | Feb   | MT    | Nursery     | Lung       | 25.1   | H1N1/2      | Unknown‡     |
| 5      | $\gamma$ 2- $\beta$ -like | PS4          | S5   | Mar   | SD    | Nursery     | Isolate    | 20.5   | H1N1        | ND           |
| 6      | C-I                       | PS5          | S6   | Apr   | IA    | Nursery     | Lung       | 27.1   | H3N2        | ND           |
| 7      | $\gamma$ 2- $\beta$ -like | PS6          | S7   | Apr   | NE    | Nursery     | Oral fluid | 24.9   | H1N1        | ND           |
| 8      | C-I                       | PS7          | S8   | Apr   | IA    | Nursery     | Lung       | 25.3   | H3N2        | ND           |
| 9      | $\gamma$ 2- $\beta$ -like | A02157797    | S9   | Apr   | IL    | Grower      | Isolate    | 19.7   | H1N1        | ND           |
| 10     | C-I                       | A02157798    | S10  | Apr   | TN    | Nursery     | Isolate    | 16.1   | H3N2        | ND           |
| 11     | C-I                       | PS8          | S11  | Apr   | IA    | Nursery     | Nasal swab | 25.3   | H1/3N1      | H1- $\alpha$ |
| 12     | C-I                       | PS9          | S12  | Apr   | MO    | Unknown     | Oral fluid | 30.2   | H3N2        | ND           |
| 13     | $\gamma$ 2- $\beta$ -like | A02157974    | S13  | Apr   | NE    | Nursery     | Isolate    | 23.9   | H1N1        | ND           |
| 14     | C-I                       | PS8          | S14  | Apr   | IA    | Nursery     | Oral fluid | 29.1   | H3N1        | ND           |
| 15     | $\gamma$ 2- $\beta$ -like | PS10         | S15  | Apr   | NE    | Nursery     | Oral fluid | 24.6   | H1N1        | ND           |
| 16     | C-I                       | PS5          | S16  | May   | IA    | Nursery     | Lung       | 34.4   | H3N2        | ND           |
| 17     | C-I                       | PS9          | S17  | May   | MO    | Nursery     | Nasal swab | 25.1   | H1/3N1/2    | H1- $\gamma$ |
| 18     | C-I                       | PS8          | S18  | May   | IA    | Grower      | Oral fluid | 27.4   | H3N1        | ND           |
| 19     | C-I                       | PS7          | S19  | May   | IA    | Nursery     | Oral fluid | 33.5   | H3N2        | ND           |
| 20     | C-I                       | PS9          | S20  | May   | MO    | Nursery     | Oral fluid | 29.4   | H1/3N1/2    | H1- $\gamma$ |

Live attenuated influenza vaccine reassortment in swine

|    |                           |           |     |      |     |          |            |      |          |              |
|----|---------------------------|-----------|-----|------|-----|----------|------------|------|----------|--------------|
| 21 | C-I                       | PS7       | S21 | May  | IA  | Nursery  | Oral fluid | 31.2 | H3N2     | ND           |
| 22 | C-I                       | PS7       | S21 | May  | IA  | Grower   | Lung       | 26.9 | H3N2     | ND           |
| 23 | C-I                       | PS11      | S22 | May  | IL  | Unknown  | Nasal swab | 24.0 | H1/3N1/2 | Unknown      |
| 24 | C-I                       | PS12      | S23 | June | IA  | Nursery  | Nasal swab | 23.7 | H3N2     | ND           |
| 25 | $\gamma$ 2- $\beta$ -like | PS13      | S24 | July | NE  | Finisher | Oral fluid | 27.7 | H1H3     | H3-2010.1    |
| 26 | $\gamma$ 2- $\beta$ -like | PS14      | S25 | July | OH  | Grower   | Oral fluid | 29.1 | H1N1     | ND           |
| 27 | $\gamma$ 2- $\beta$ -like | PS6       | S15 | Aug  | NE  | Nursery  | Oral fluid | 32.7 | H1N1     | ND           |
| 28 | $\gamma$ 2- $\beta$ -like | PS10      | S7  | Aug  | NE  | Nursery  | Oral fluid | 22.0 | H1N1     | ND           |
| 29 | $\gamma$ 2- $\beta$ -like | A02254795 | S26 | Aug  | IA  | Nursery  | Isolate    | 16.0 | H1N1     | ND           |
| 30 | C-I                       | PS15      | S27 | Aug  | MO  | Unknown  | Oral fluid | 25.4 | H1/3N2   | H1- $\gamma$ |
| 31 | $\gamma$ 2- $\beta$ -like | PS6       | S15 | Aug  | USA | Nursery  | Oral fluid | 26.0 | H1N1     | ND           |
| 32 | C-I                       | PS16      | S28 | Aug  | MN  | Nursery  | Oral fluid | 29.9 | H3N2     | ND           |
| 33 | C-I                       | PS9       | S29 | Sept | MO  | Unknown  | Oral fluid | 29.9 | H1/3N1/2 | H1- $\gamma$ |
| 34 | C-I                       | A02257614 | S30 | Sept | MO  | Finisher | Isolate    | 18.0 | H3N2     | ND           |
| 35 | C-I                       | PS17      | S31 | Oct  | MI  | Finisher | Oral fluid | 34.0 | H3N3     | ND           |

HA = hemagglutinin; IA = Iowa; IL = Illinois; KY = Kentucky; MI = Michigan; MN = Minnesota; MO = Missouri; MT = Montana;

ND = not detected; NE = Nebraska; OH = Ohio; PCR Ct = reverse-transcription real-time PCR cycle threshold; PS = production system; SD = South Dakota; S = site; TN = Tennessee.

\* Sequencing specimen.

† A0xxxxxx: USDA surveillance bar code.

‡ Unknown indicates that multiple subtypes may be live attenuated influenza vaccine virus or wild-type.

**Supplementary Table 2.** Clinical metadata reported from 35 porcine cases submitted to the Iowa State University Veterinary Diagnostic Laboratory that detected a MN99-like H1 or TX98-like H3 hemagglutinin sequence.

| HA no. | HA clade                  | Clinical signs      | Lung lesions*          | Histopathology            | PCR Ct<br>PRRSV | PCR Ct<br>PCV-2 | PCR Ct<br>MHP | Bacteria                                  |
|--------|---------------------------|---------------------|------------------------|---------------------------|-----------------|-----------------|---------------|-------------------------------------------|
| 1      | C-I                       | Respiratory disease | Edema                  | Necrotizing bronchiolitis | 18.6            | ND              | 27.7          | <i>P. multocida</i> ; <i>S. suis</i>      |
| 2      | C-I                       | NR                  | NA                     | NA                        | ND <sup>g</sup> | ND              | ND            | <i>H. parasuis</i>                        |
| 3      | $\gamma$ 2- $\beta$ -like | NR                  | NA                     | NA                        | ND              | NR              | ND            | NR                                        |
| 4      | $\gamma$ 2- $\beta$ -like | Respiratory disease | Consolidation          | Necrotizing bronchiolitis | ND              | NR              | NR            | NR                                        |
| 5      | $\gamma$ 2- $\beta$ -like | Respiratory disease | NR                     | Necrotizing bronchiolitis | 15.2            | ND              | NR            | <i>H. parasuis</i>                        |
| 6      | C-I                       | Wasting             | Congestion, pleuritis  | Broncho-pneumonia         | ND              | NR              | NR            | <i>H. parasuis</i>                        |
| 7      | $\gamma$ 2- $\beta$ -like | Respiratory disease | Congestion, hemorrhage | NA                        | NR              | NR              | NR            | NR                                        |
| 8      | C-I                       | Respiratory disease | None reported          | Necrotizing bronchiolitis | ND              | 30.7            | ND            | <i>B. bronchiseptica</i> ; <i>S. suis</i> |
| 9      | $\gamma$ 2- $\beta$ -like | Respiratory disease | NA                     | Necrotizing bronchiolitis | 29.2            | NR              | NR            | <i>P. multocida</i>                       |
| 10     | C-I                       | Respiratory disease | Consolidation          | Necrotizing bronchiolitis | ND              | NR              | NR            | NSG                                       |
| 11     | C-I                       | Respiratory disease | NR                     | Necrotizing bronchiolitis | NR              | NR              | NR            | <i>H. parasuis</i>                        |
| 12     | C-I                       | NR                  | NA                     | NA                        | ND              | NR              | NR            | NR                                        |
| 13     | $\gamma$ 2- $\beta$ -like | Respiratory disease | Consolidation          | Necrotizing bronchiolitis | NR              | NR              | NR            | NSG                                       |
| 14     | C-I                       | Respiratory disease | Consolidation          | Broncho-pneumonia         | 28.3            | ND              | NR            | <i>S. suis</i>                            |
| 15     | $\gamma$ 2- $\beta$ -like | Respiratory disease | NA                     | NA                        | NR              | NR              | NR            | NA                                        |

Live attenuated influenza vaccine reassortment in swine

|    |                           |                     |               |                           |      |    |    |                                  |
|----|---------------------------|---------------------|---------------|---------------------------|------|----|----|----------------------------------|
| 16 | C-I                       | Respiratory disease | Consolidation | NR                        | ND   | NR | NR | <i>B. bronchiseptica</i>         |
| 17 | C-I                       | NR                  | NA            | NA                        | NR   | NR | NR | NR                               |
| 18 | C-I                       | Respiratory disease | NA            | NA                        | 25   | NR | NR | NR                               |
| 19 | C-I                       | NR                  | NA            | NA                        | NR   | NR | NR | NR                               |
| 20 | C-I                       | NR                  | NA            | NA                        | ND   | NR | NR | NR                               |
| 21 | C-I                       | NR                  | NA            | NA                        | NR   | NR | NR | NR                               |
| 22 | C-I                       | Respiratory disease | Consolidation | Necrotizing bronchiolitis | ND   | ND | ND | <i>P. multocida; H. parasuis</i> |
| 23 | C-I                       | NR                  | NA            | NA                        | NR   | NR | NR | NR                               |
| 24 | C-I                       | NR                  | NA            | NA                        | NR   | NR | NR | NR                               |
| 25 | $\gamma$ 2- $\beta$ -like | NR                  | NA            | NA                        | NR   | NR | NR | NR                               |
| 26 | $\gamma$ 2- $\beta$ -like | NR                  | NA            | NA                        | ND   | NR | NR | NR                               |
| 27 | $\gamma$ 2- $\beta$ -like | NR                  | NA            | NA                        | NR   | NR | NR | NR                               |
| 28 | $\gamma$ 2- $\beta$ -like | NR                  | NA            | NA                        | NR   | NR | NR | NR                               |
| 29 | $\gamma$ 2- $\beta$ -like | Respiratory disease | Consolidation | Necrotizing bronchiolitis | 26.1 | NR | NR | <i>S. suis</i>                   |
| 30 | C-I                       | NR                  | NA            | NA                        | ND   | NR | ND | NR                               |
| 31 | $\gamma$ 2- $\beta$ -like | NR                  | NA            | NA                        | NR   | NR | NR | NR                               |
| 32 | C-I                       | Respiratory disease | Consolidation | Necrotizing bronchiolitis | ND   | ND | ND | <i>S. suis</i>                   |
| 33 | C-I                       | NR                  | NA            | NA                        | NR   | NR | NR | NR                               |
| 34 | C-I                       | Respiratory disease | Congestion    | Necrotizing bronchiolitis | ND   | NR | 23 | NSG                              |
| 35 | C-I                       | NR                  | NA            | NA                        | NR   | NR | NR | NR                               |

HA = hemagglutinin; MHP = *Mycoplasma hyopneumoniae*; NA = not applicable; ND = not detected; NR = none reported; PCR Ct = reverse-transcription real-time PCR cycle threshold value; PRRSV = porcine reproductive and respiratory syndrome virus.

\* Lung lesions indicate macroscopic lung lesions.

Live attenuated influenza vaccine reassortment in swine

1

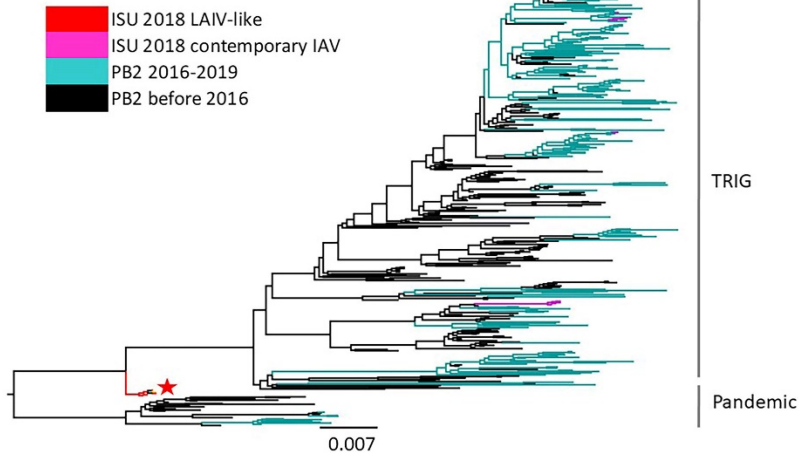

2

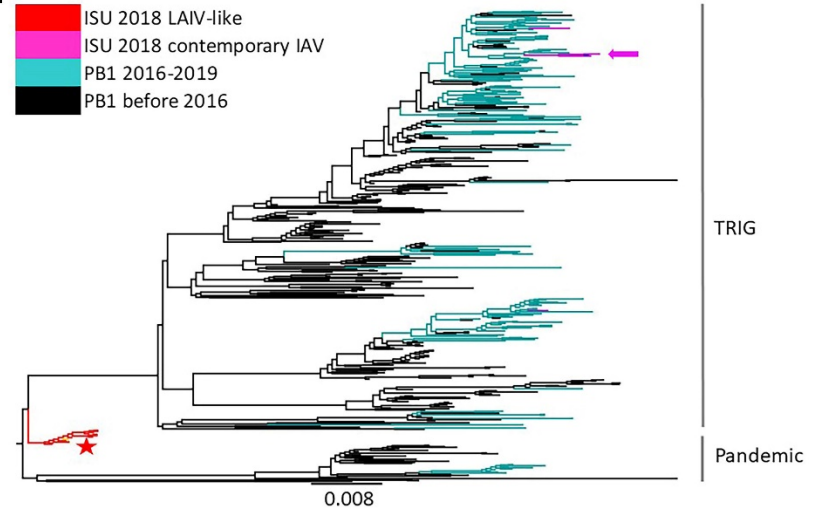

3

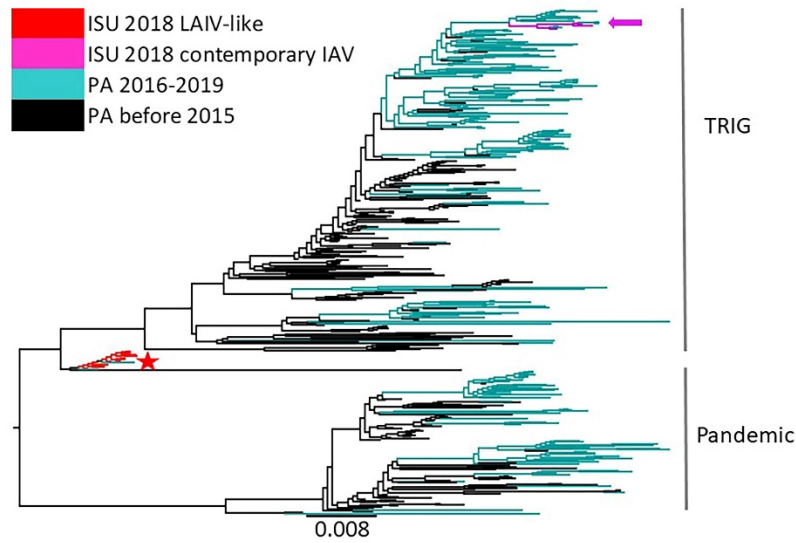

4

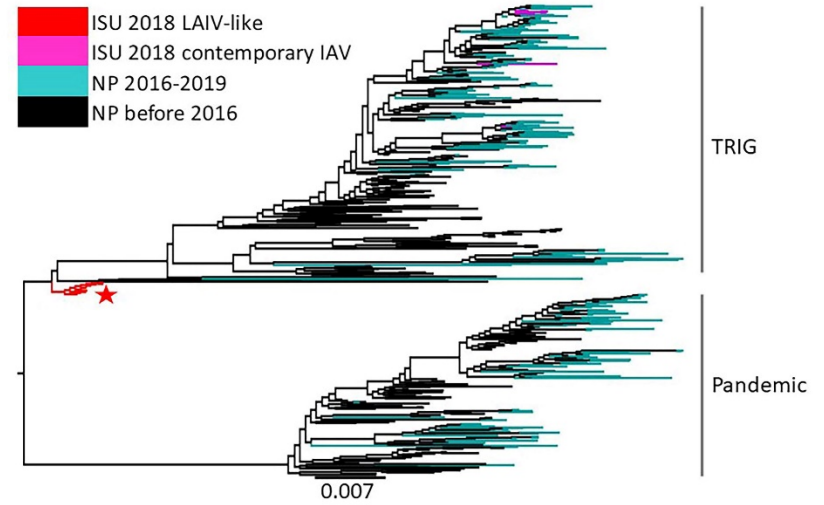

Live attenuated influenza vaccine reassortment in swine

5

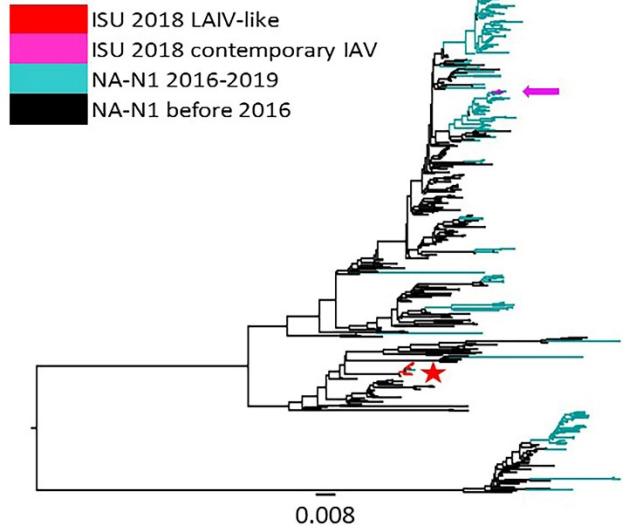

6

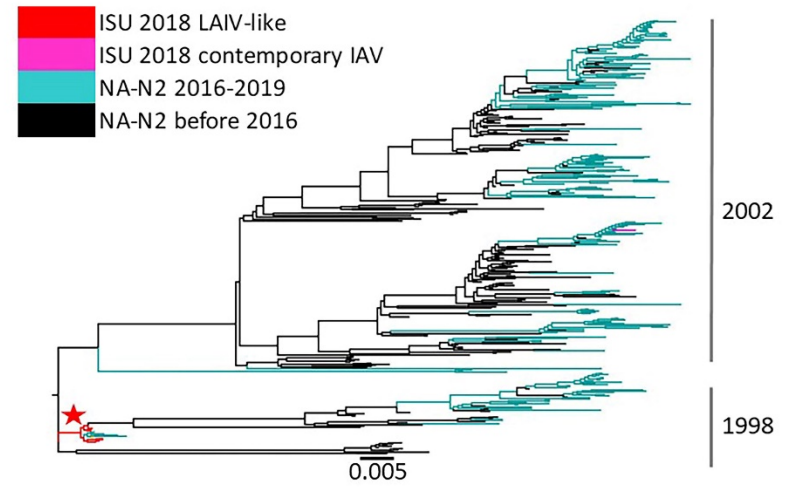

7

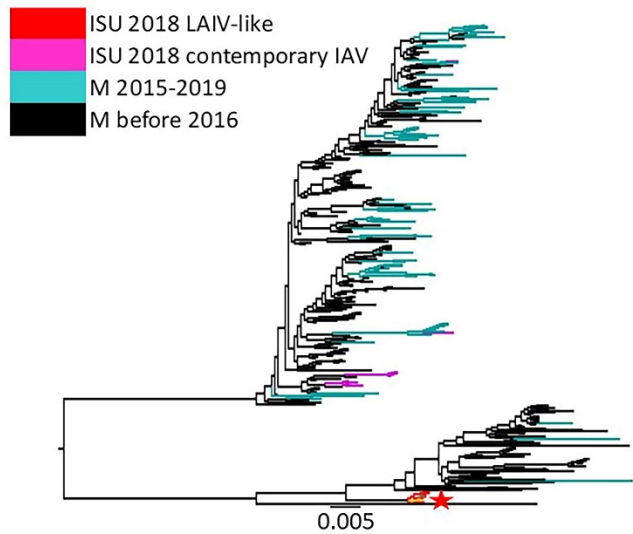

8

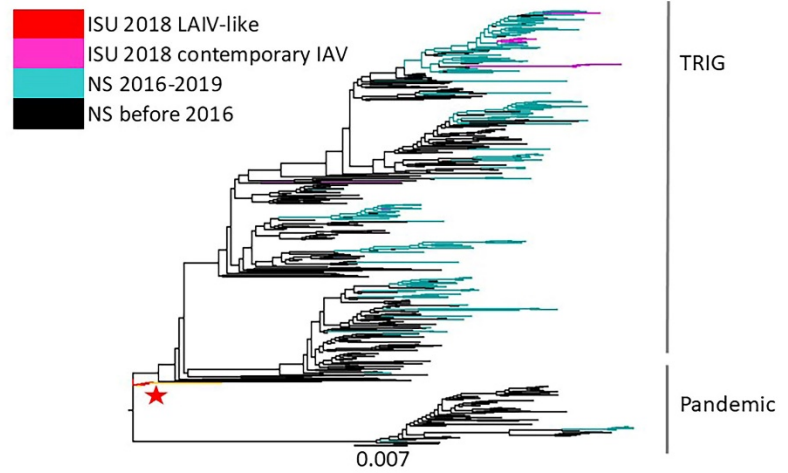

**Supplementary Figures 1–8.** Maximum-likelihood phylogenetic tree of the neuraminidase and internal genes generated from the whole genome sequences represented in Figure 3 and including TX98 (CY095675) and live attenuated influenza vaccine (LAIV) internal gene segments, contemporary triple reassortant internal gene (TRIG) segments, contemporary 2009 H1 pandemic internal gene segments, and contemporary influenza A virus (IAV) neuraminidase clades. TX98-like or Mn99-like gene segments are represented in red and form their own cluster regardless of gene segment. TX98 and LAIV sequences are shown in yellow and are indicated with a red star. Co-detections with contemporary IAV are designated with a magenta arrow. Turquoise color demonstrates IAV gene segments from 2015 to 2019. Black demonstrates IAV gene segments before 2016. **Supplementary Figure 1.** Polymerase basic 2 (PB2) phylogenetic tree. **Supplementary Figure 2.** PB1 phylogenetic tree. **Supplementary Figure 3.** Polymerase acidic (PA) phylogenetic tree. **Supplementary Figure 4.** Nucleoprotein (NP) phylogenetic tree. **Supplementary Figure 5.** N1 neuraminidase (NA) phylogenetic tree. **Supplementary Figure 6.** N2 NA phylogenetic tree. **Supplementary Figure 7.** Matrix (M) phylogenetic tree. **Supplementary Figure 8.** Nonstructural (NS) phylogenetic tree.
